# Supplementary material for: Camptothecin loaded casein nanosystem for tuning the therapeutic efficacy against highly metastatic triple-negative breast cancer cells
Source: Royal Society of Chemistry journal article supplement (doi:10.1039/d2bm01814d), 2023-01-01
Supplement: d2bm01814d1.pdf [file d2bm01814d1.pdf]

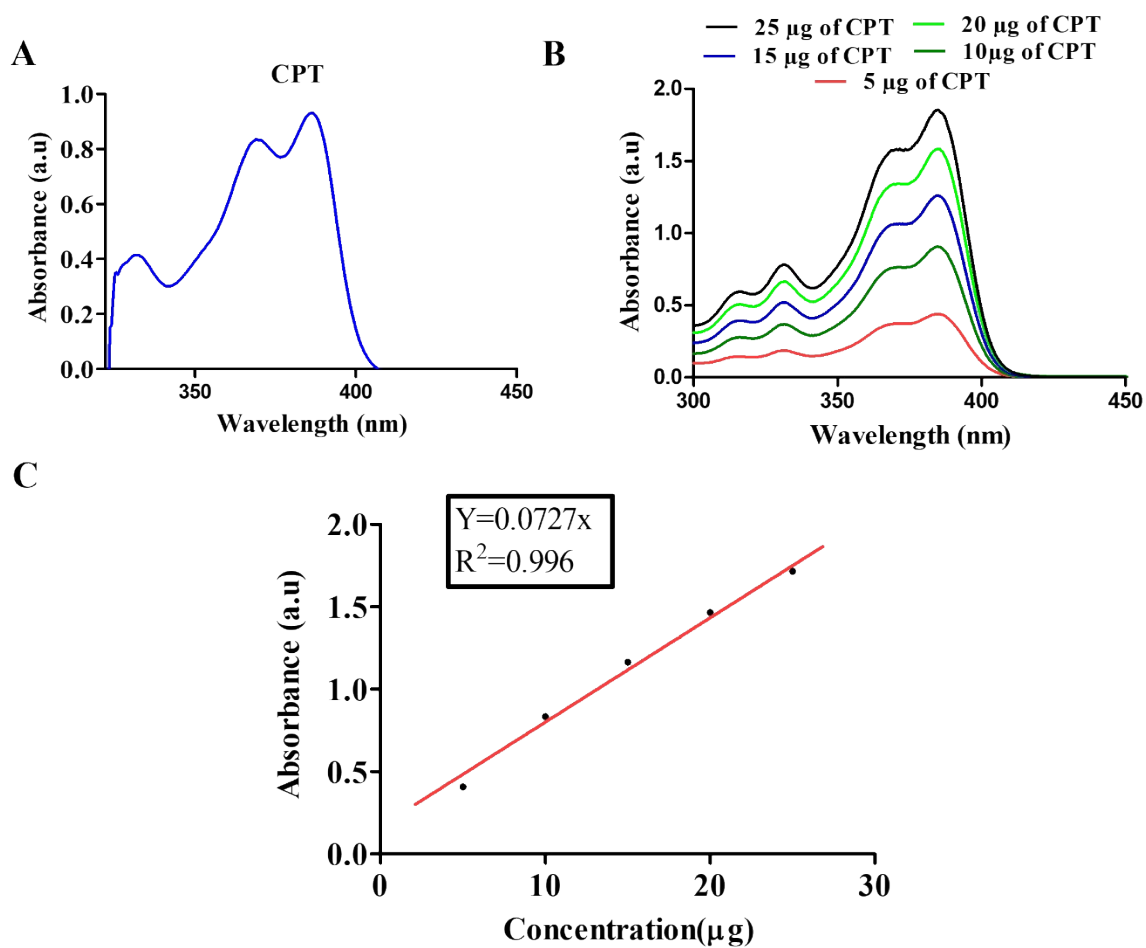

**Fig. S1** (A) UV-visible and fluorescence spectra of CPT. (B & C) Concentrations dependent UV absorbance of CPT.

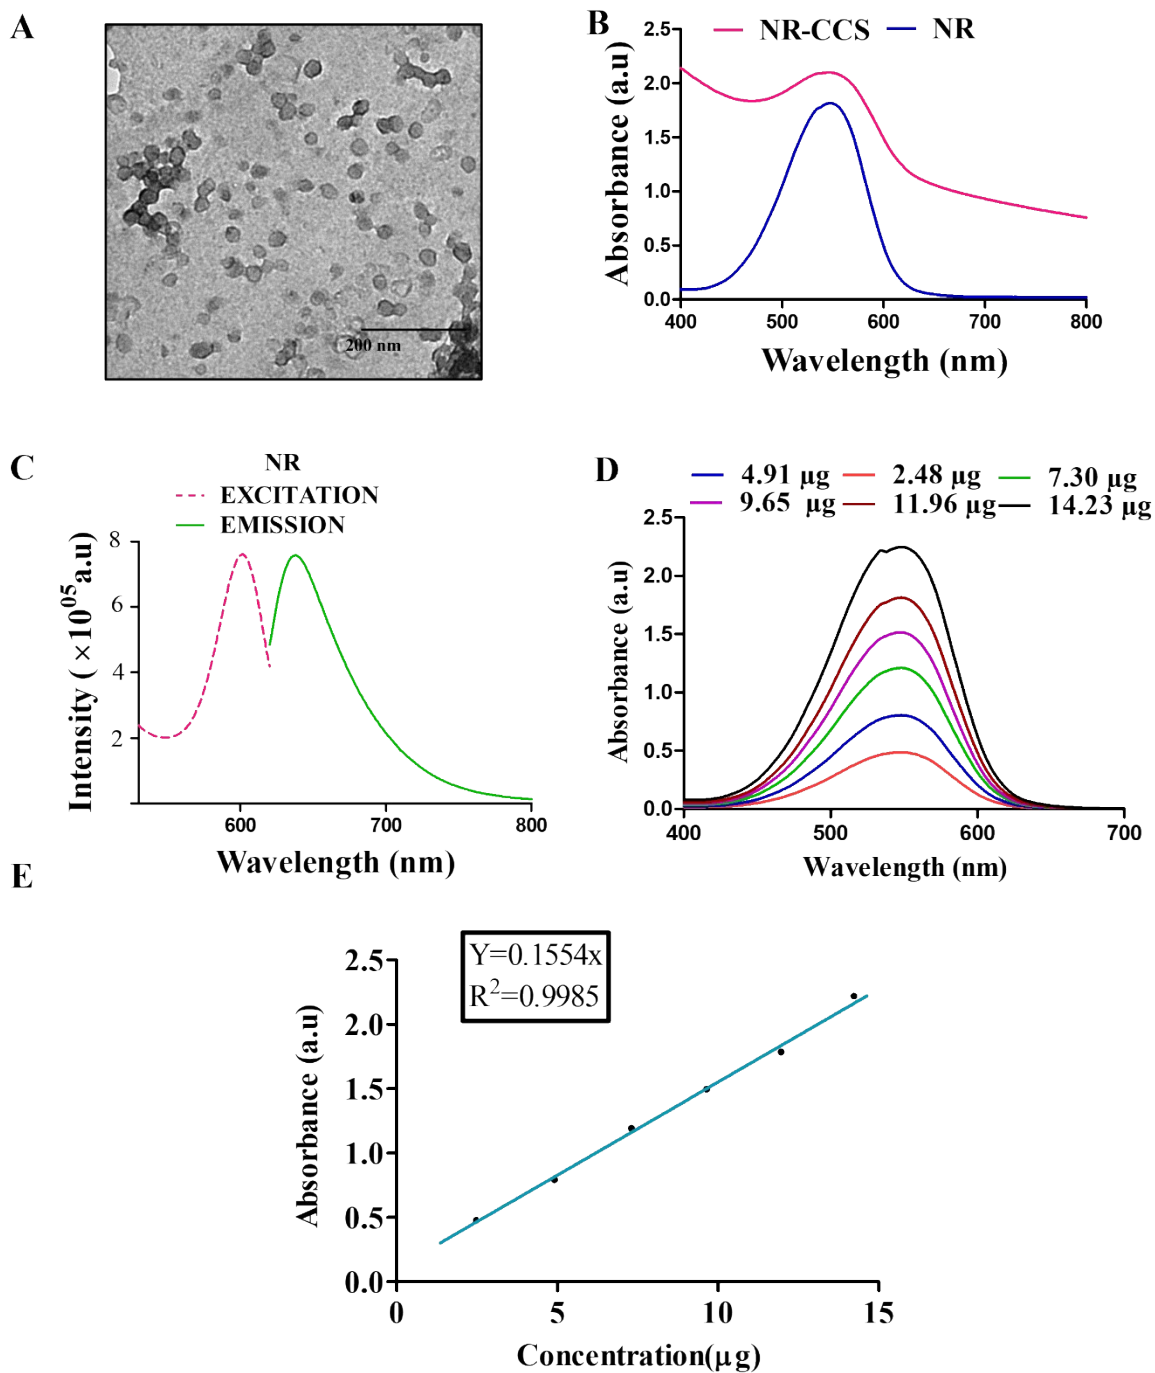

**Fig. S2** (A) TEM image of CS NPs. (B) UV-visible spectra of NR and NR-CCS NPs. (C) Fluorescence spectra of NR. (D & E) Concentrations dependent UV absorbance of NR.

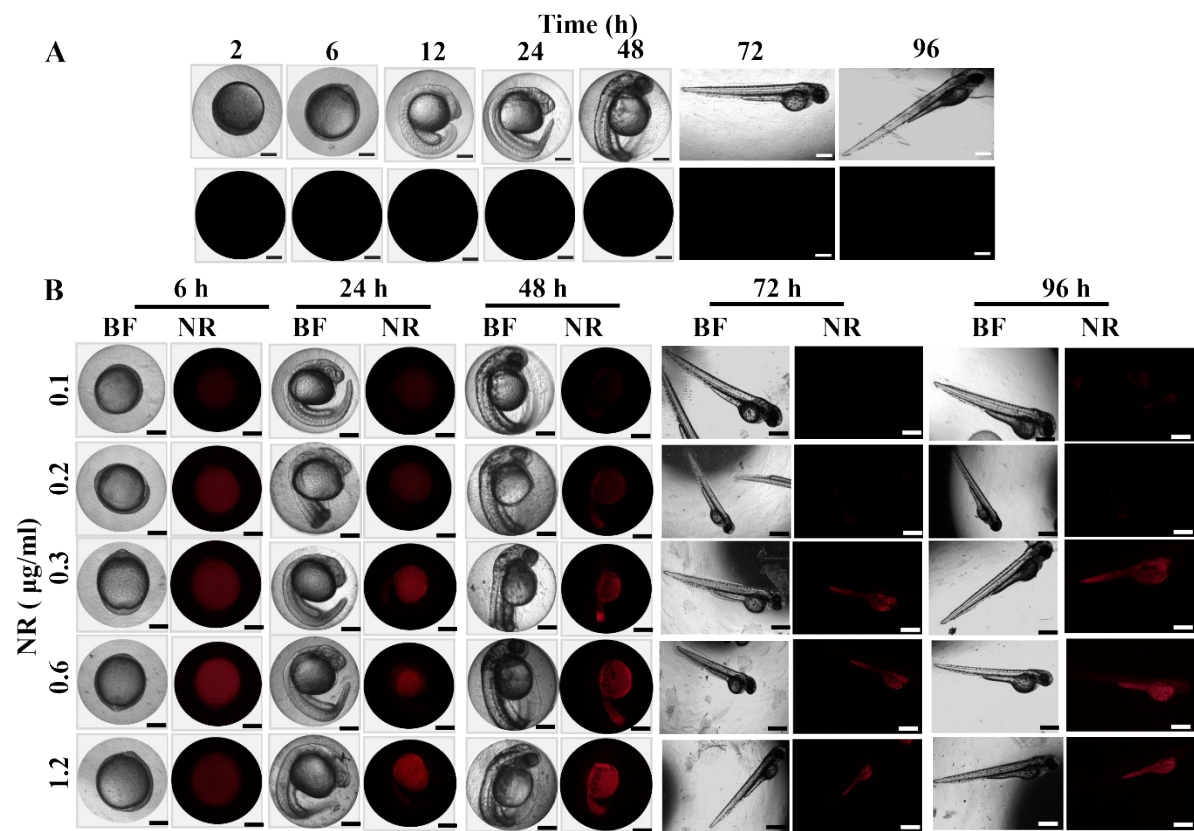

**Fig. S3** (A) Images of untreated control of zebra fish embryo for biocompatibility study. (B) Treated with free NR, positive control group for biocompatibility study. Scale bar:100  $\mu\text{m}$ .

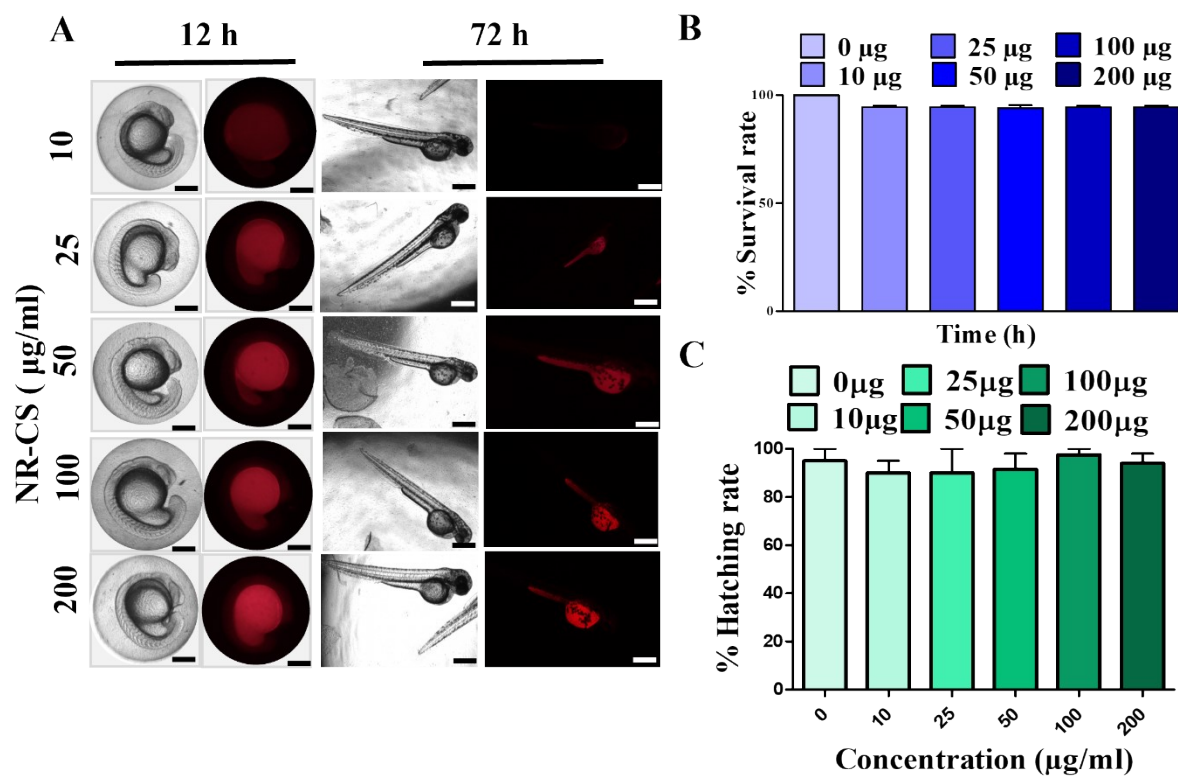

**Fig. S4** (A) Analysis of NR-CS NPs biocompatibility in zebra fish embryo for 12 and 72 h, treated with various concentration of NR-CS NPs. NR was used to see the presence of CS NPs inside the embryo. Red fluorescent corresponds to the localization of NR-CS NPs. Scale bar:100 µm. Graphical representation of (B) survival rate and (C) hatching rate of embryo on different time points upon treatment with NR-CS NPs.

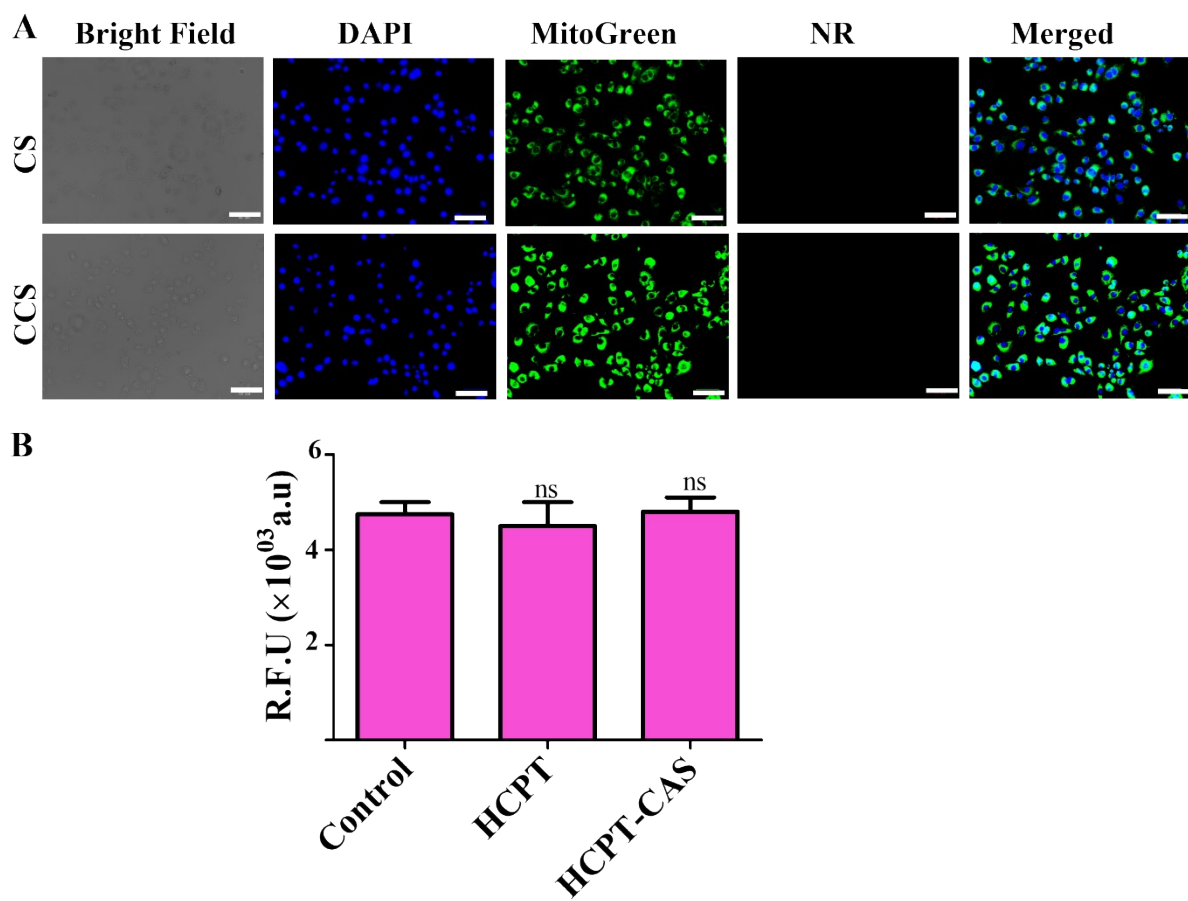

**Fig. S5** (A) Cellular uptake study of CS and CCS NPs in 4T1 cells. Scale bar: 50  $\mu$ m. (B) Graphical representation of cellular uptake of CS and CCS NPs.

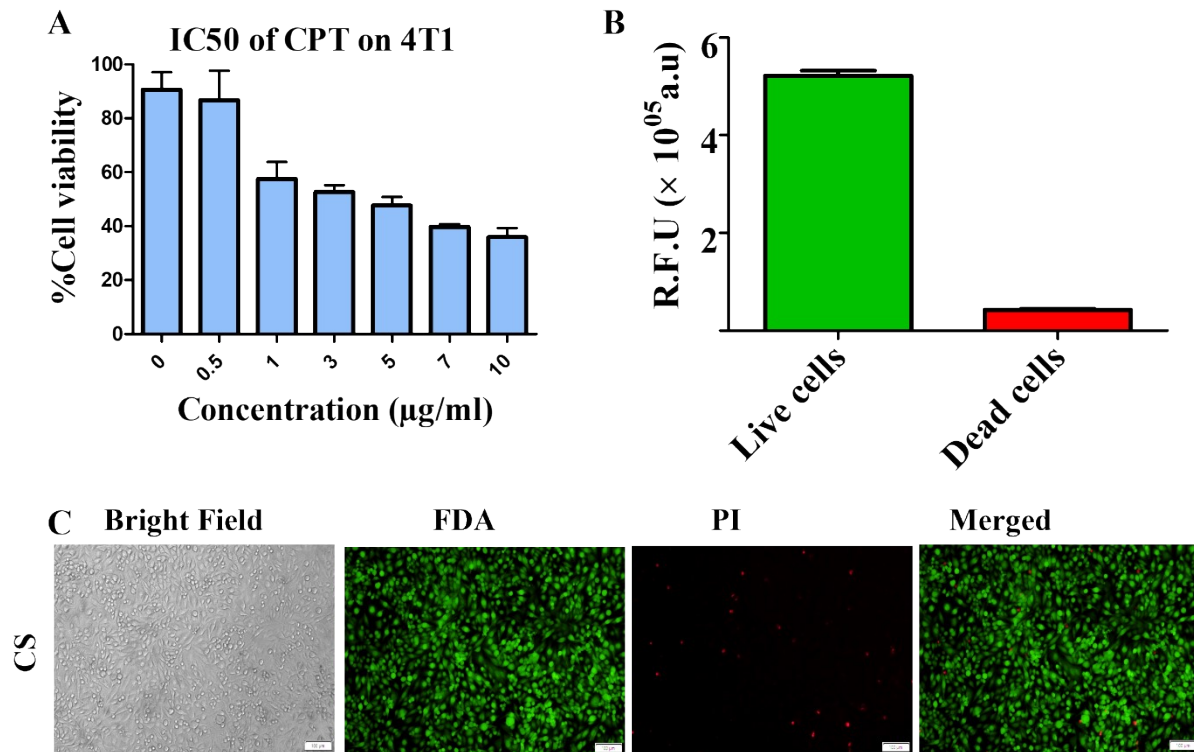

**Fig. S6** (A) IC<sub>50</sub> value of CPT in 4T1 cells after 24 h treatment. (B) Graphical representation of live and dead cells treated with CS NPs. (C) Live-dead imaging of 4T1 cells treated with CS NPs for 24 h. Green and red fluorescence corresponds to live and dead cells respectively. Scale bar: 100 µm.

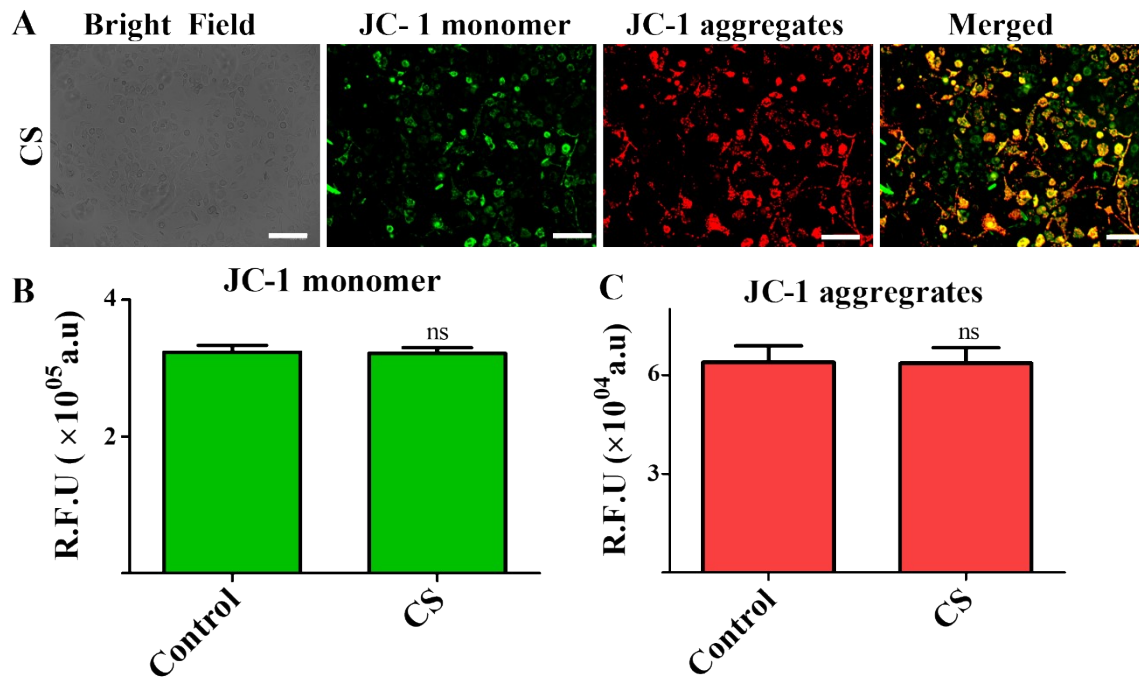

**Fig. S7** (A) Mitochondrial membrane potential analysis of 4T1 cells after 10 h treatment with CS NPs, using JC-1 stain. Green fluorescence exhibited JC-1 monomer in cytoplasm and red fluorescence exhibited JC-1 aggregates in core mitochondria, merged image to show the co-localization of monomer and aggregates. Scale bar: 100 µm. (B, C) Graphical representation of JC-1 monomer and JC-1 aggregates respectively.

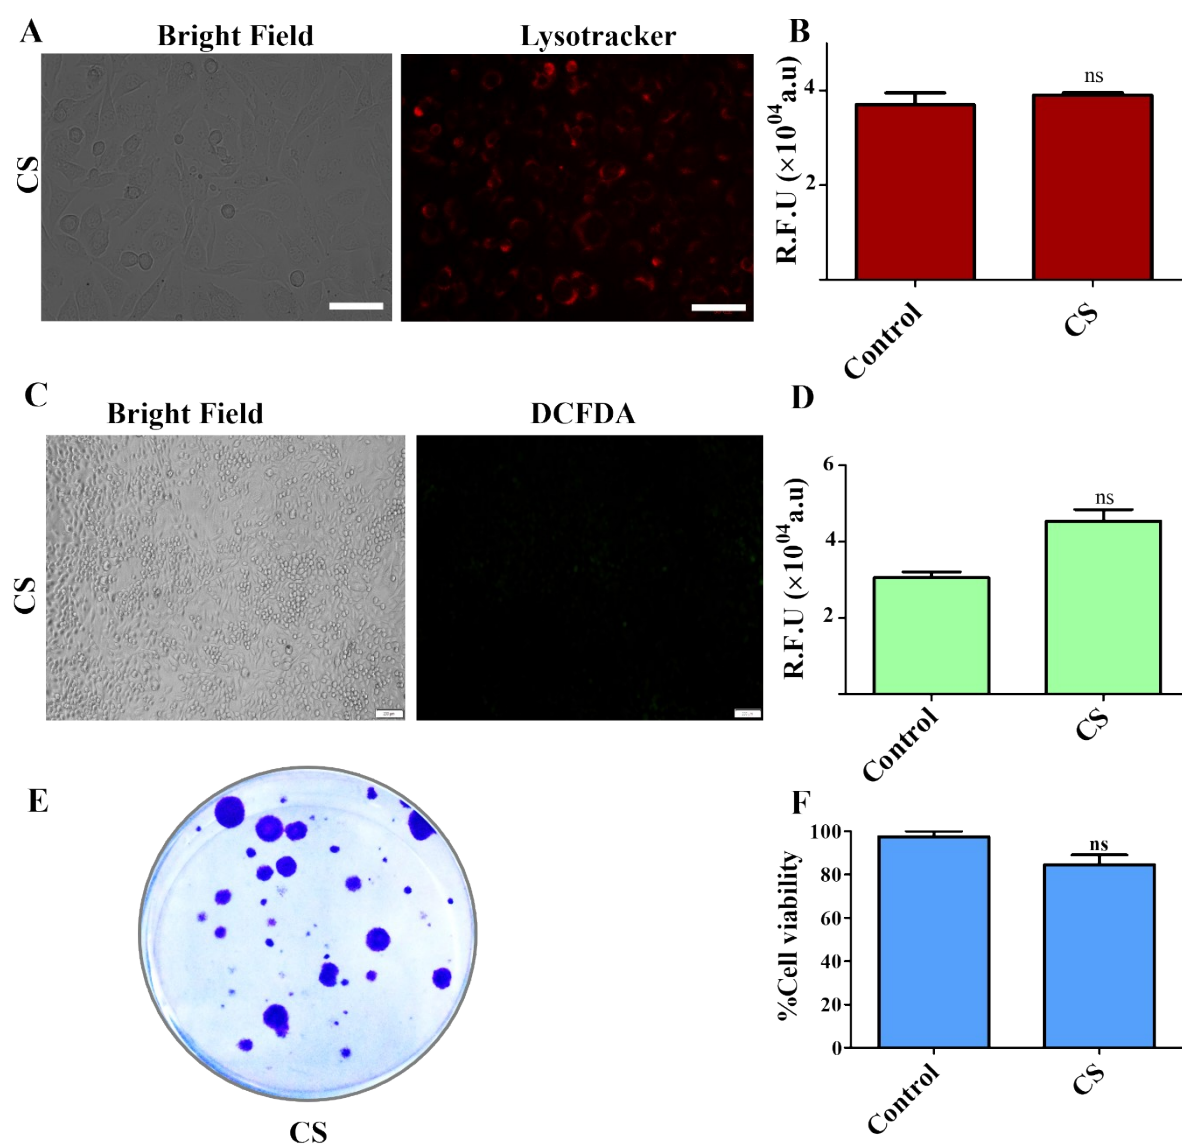

**Fig. S8** (A) Analysis of lysosomal localization of CS NPs after 10 h incubation in 4T1 cells using deep red lysotracker. Scale bar: 50  $\mu$ m. (B) Graphical representation of lysosomal localization of CS NPs. (C) DCFDA analysis in 4T1 cells on treatment with CS NPs for 24 h to see the reactive oxygen species (ROS) generation. Scale bar: 100  $\mu$ m. (D) Graphical representation for DCFDA analysis. (E) Clonogenic assay in 4T1 cells to see the regrowth on post treatment. (F) Graphical representation of cell viability % in clonogenic assay.

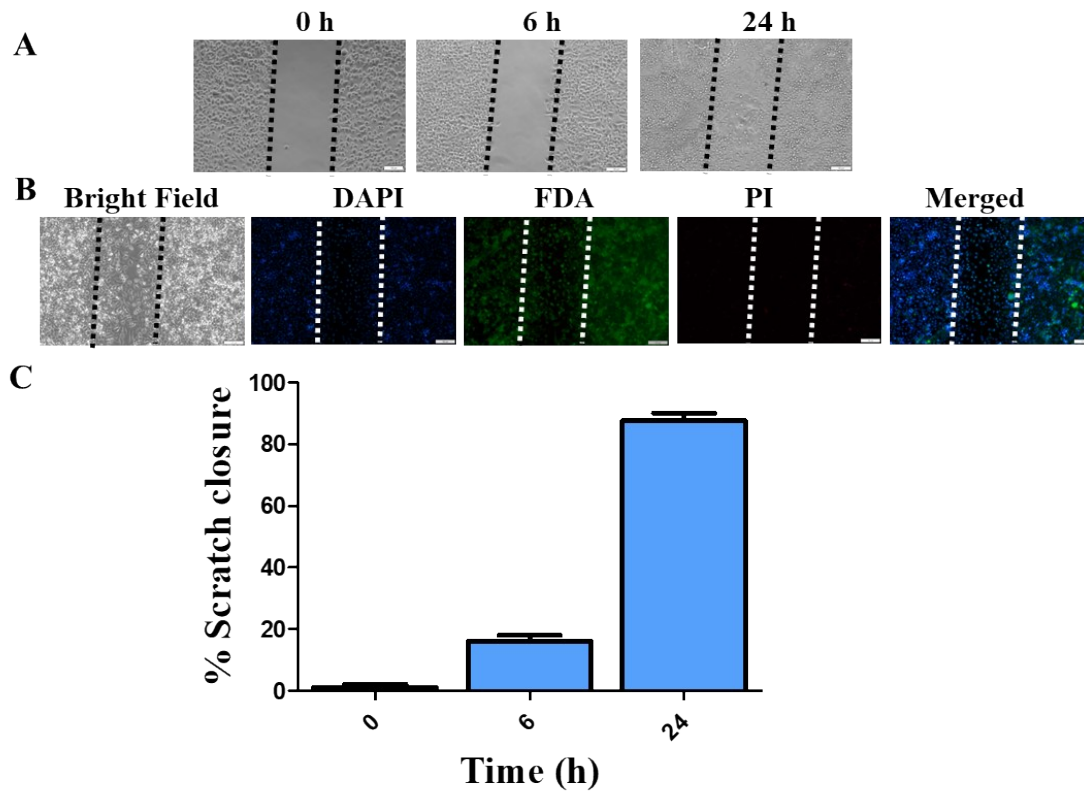

**Fig. S9** (A) Scratch assay in 4T1 cells on treatment with CS NPs for 0, 6 and 24 h. (B) Live-dead imaging after 24 hr of migrated cells treated with CS NPs; blue fluorescence (DAPI) to see the nucleus of cells, green fluorescence (FDA) corresponds to live cells, red fluorescence (PI) corresponds to dead cells and merged image to see the co-localization. All scale bar: 100  $\mu$ m. (C) Graphical representation of % of scratch closure on 0, 6 and 24 h.

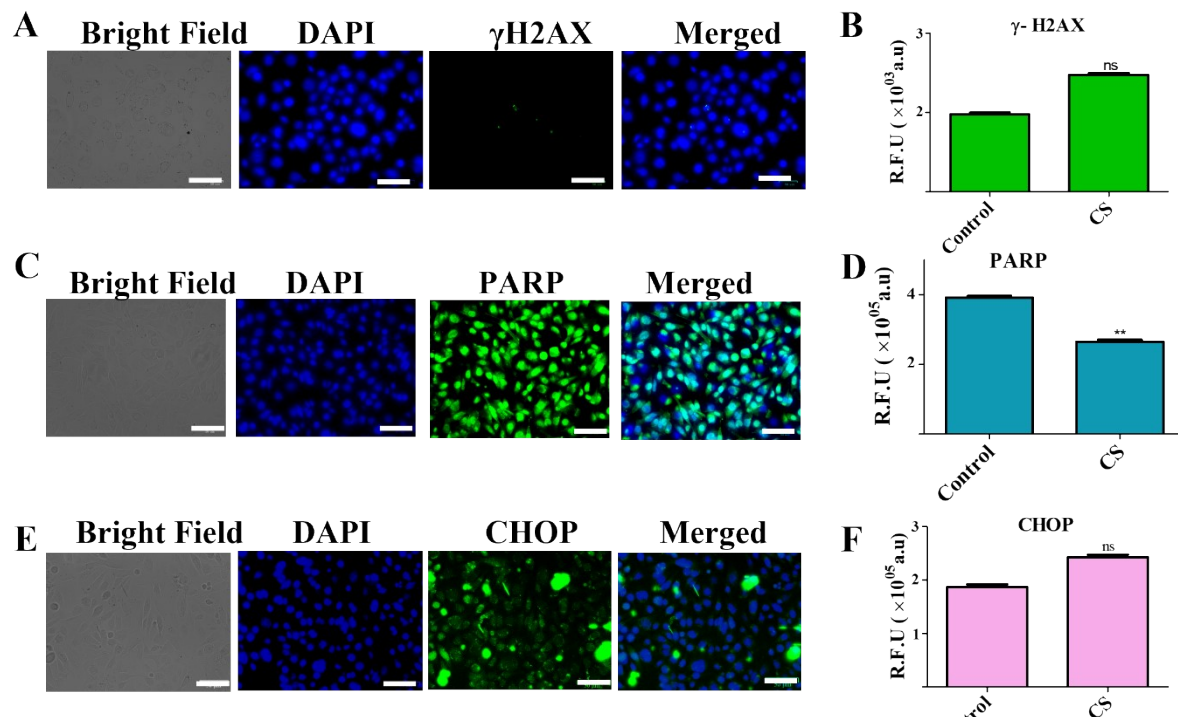

**Fig. S10** (A, C & E) Immunofluorescence imaging of 4T1 cells using Alexa Fluor® 488 to re-ensure the expression of  $\gamma$ H2Ax, PARP and CHOP respectively on treatment with CS NPs. Green fluorescence corresponds to the expression of  $\gamma$ H2Ax, PARP and CHOP respectively. Scale bar: 50  $\mu$ m. (B, D & F) Graphical representations of fluorescence intensity corresponds to expression of  $\gamma$ H2Ax, PARP and CHOP respectively.

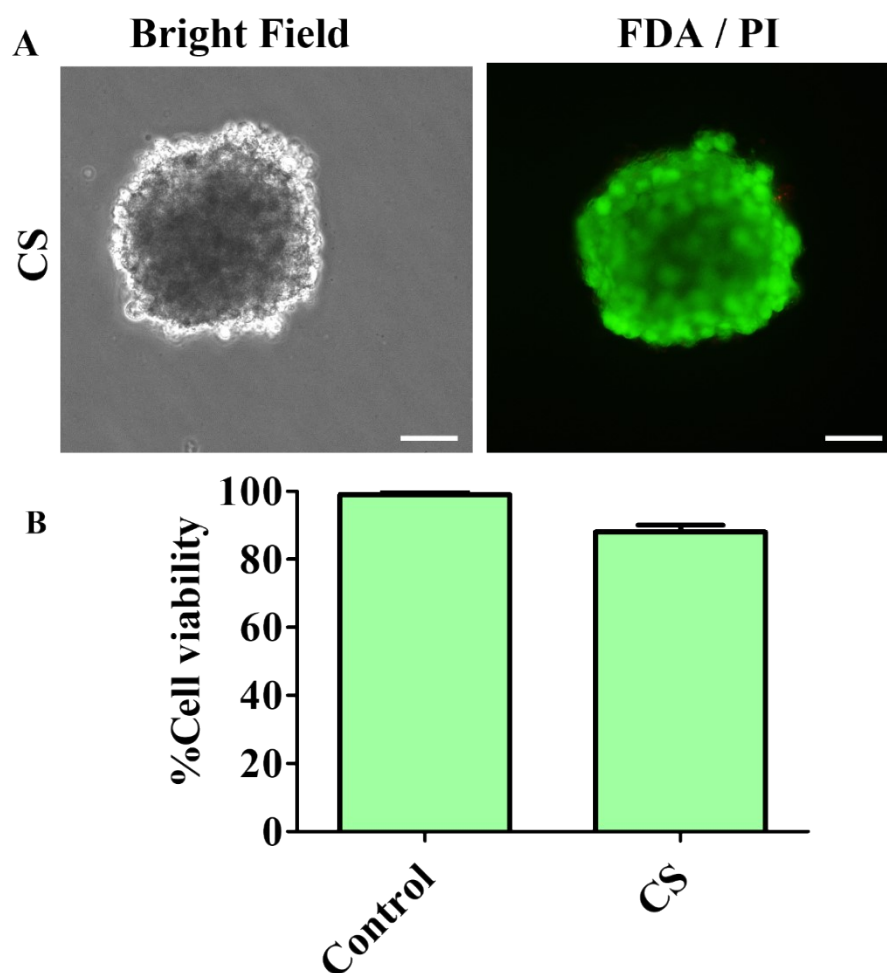

**Fig. S11** (A) *In-vitro* analysis of deep tumor tissue penetration of CS NPs in 3-D spheroids of 4T1 cells after 24 h treatment with CS NPs. Green fluorescence corresponds to live cells, red fluorescence corresponds to dead cells and merged image represents the co-localization of live and dead cells. Scale bar: 100  $\mu$ m. (B) Graphical representation of cell viability in 3-d spheroids
